# Supplementary material for: A kinase-dependent checkpoint prevents escape of immature ribosomes into the translating pool
Source: PubMed Central journal article supplement (PMC6934326; doi:10.1371/journal.pbio.3000329), 2019-12-13

1A Gal::Nob1

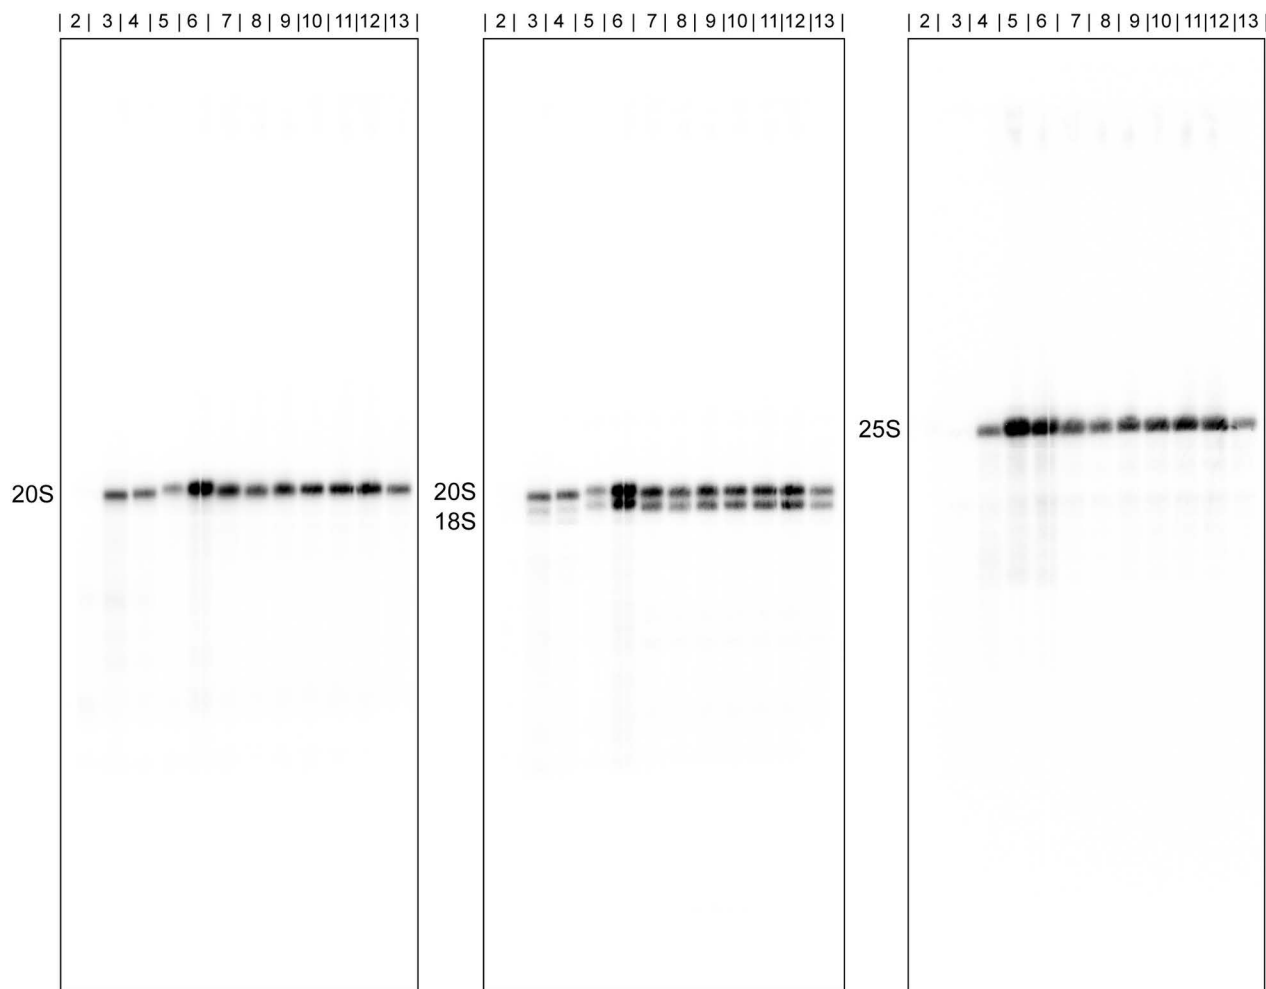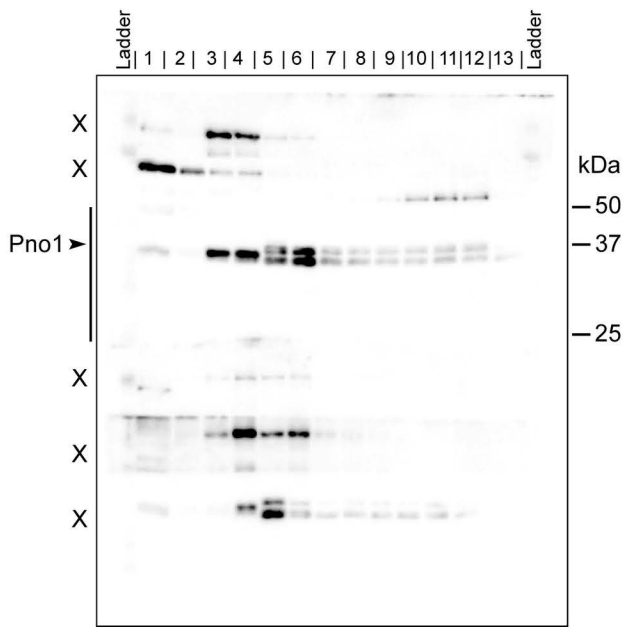

**1D** WT + Nob1**1E** WT + Nob1-D15N

| 2 | 3 | 4 | 5 | 6 | 7 | 8 | 9 | 10 | 11 | 12 | 13 | | 2 | 3 | 4 | 5 | 6 | 7 | 8 | 9 | 10 | 11 | 12 | 13 |

20S

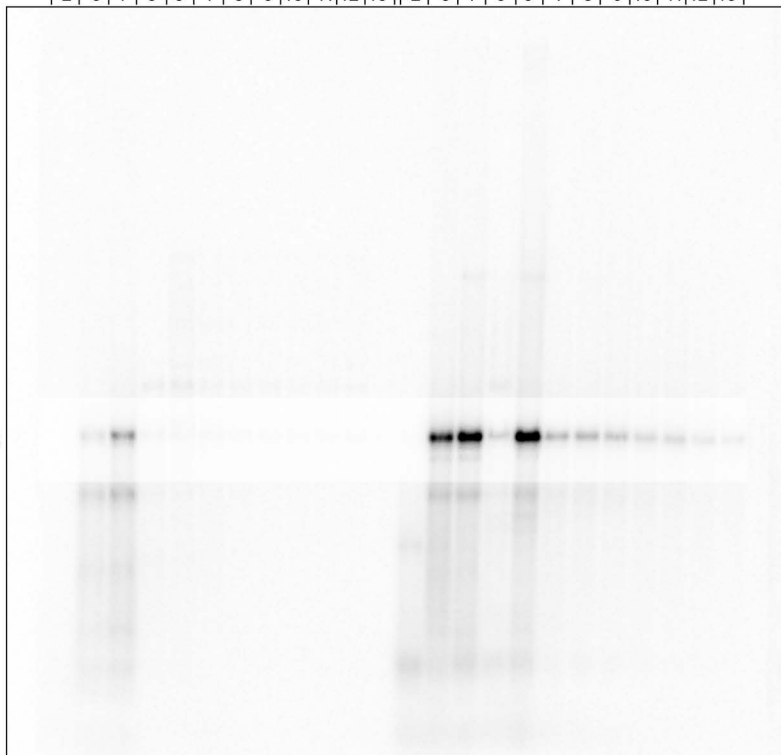**1D** WT + Nob1**1E** WT + Nob1-D15N

| 2 | 3 | 4 | 5 | 6 | 7 | 8 | 9 | 10 | 11 | 12 | 13 | | 2 | 3 | 4 | 5 | 6 | 7 | 8 | 9 | 10 | 11 | 12 | 13 |

20S  
18S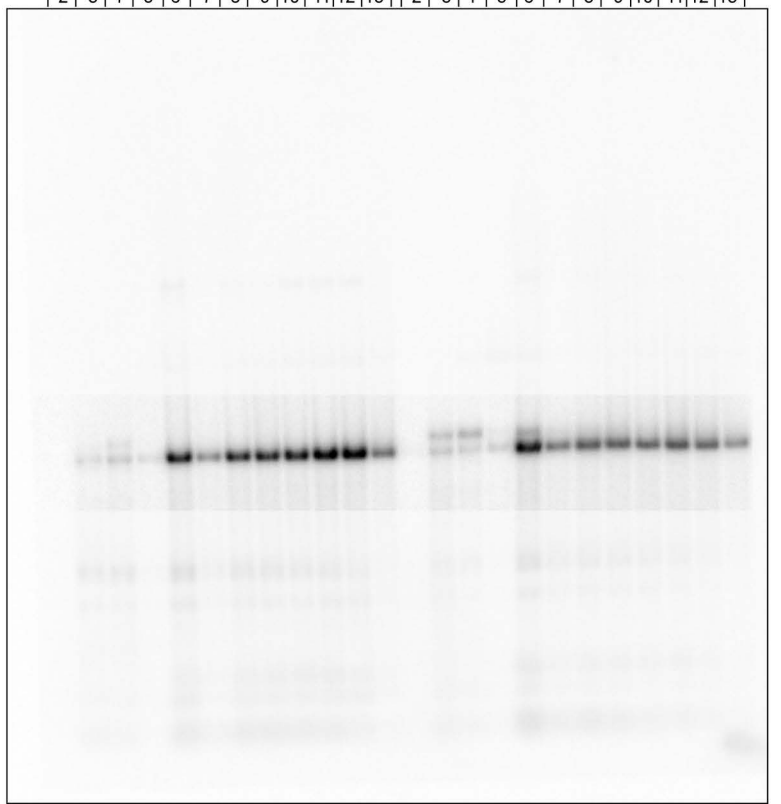

**1D WT + Nob1****1E WT + Nob1-D15N**

| 2 | 3 | 4 | 5 | 6 | 7 | 8 | 9 | 10 | 11 | 12 | 13 | | 2 | 3 | 4 | 5 | 6 | 7 | 8 | 9 | 10 | 11 | 12 | 13 |

25S

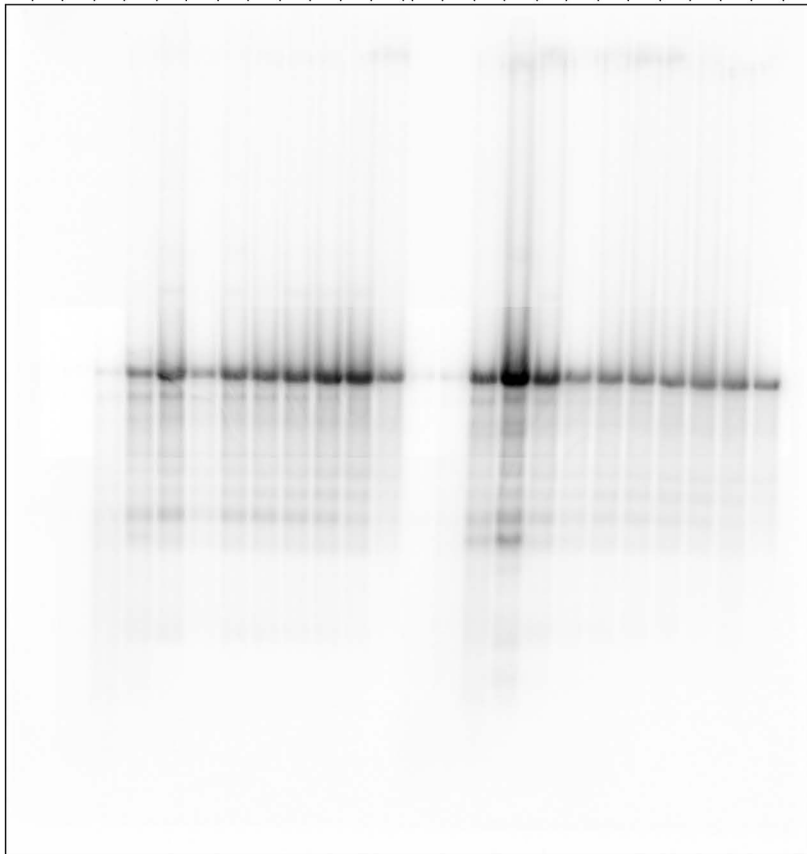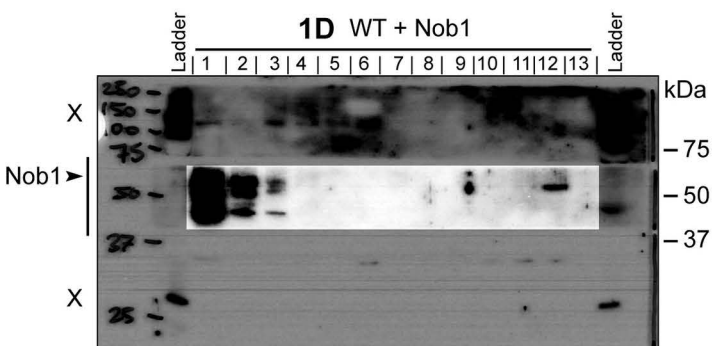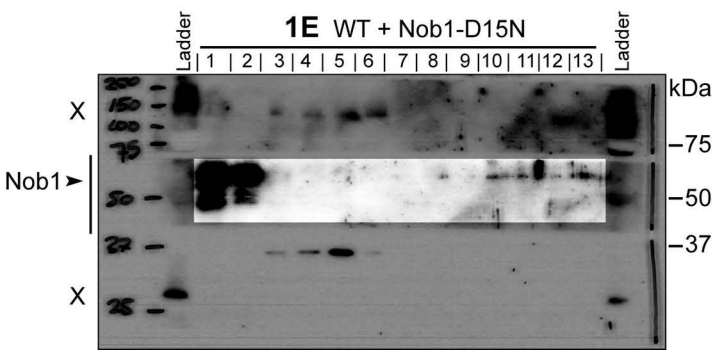

**1F** WT + TEF::Nob1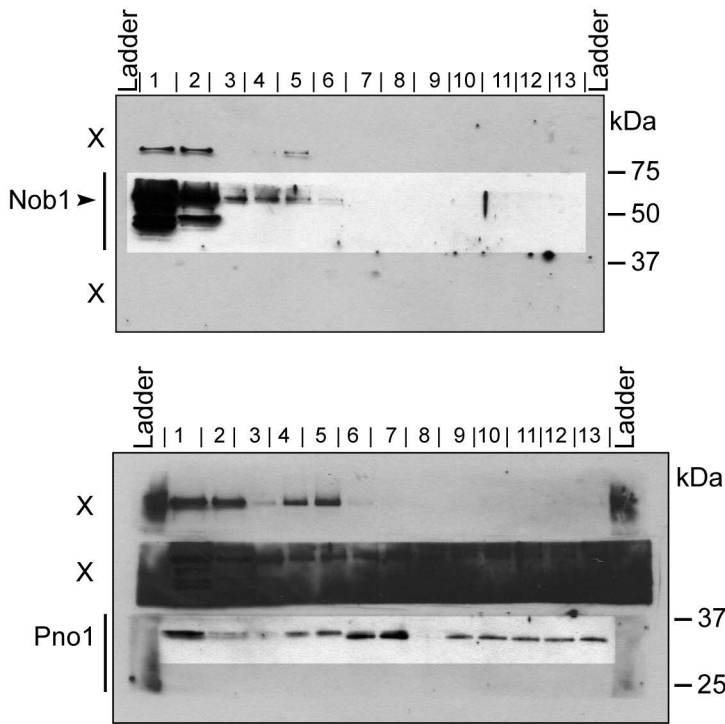

**3B**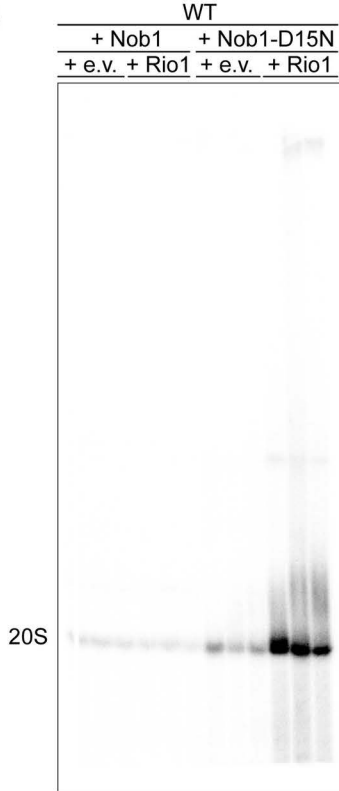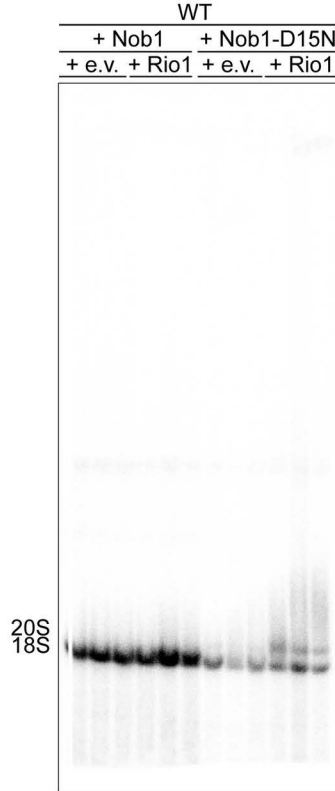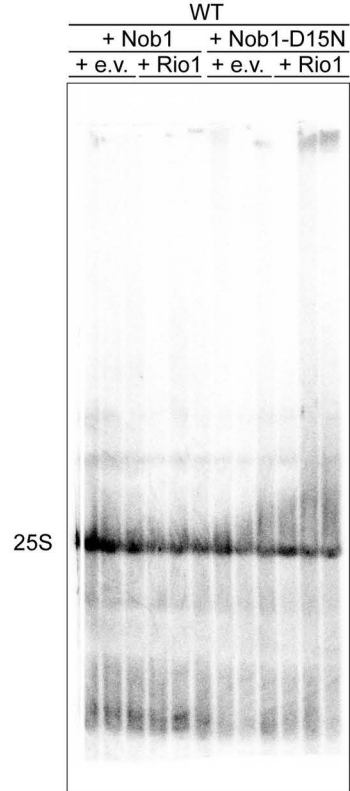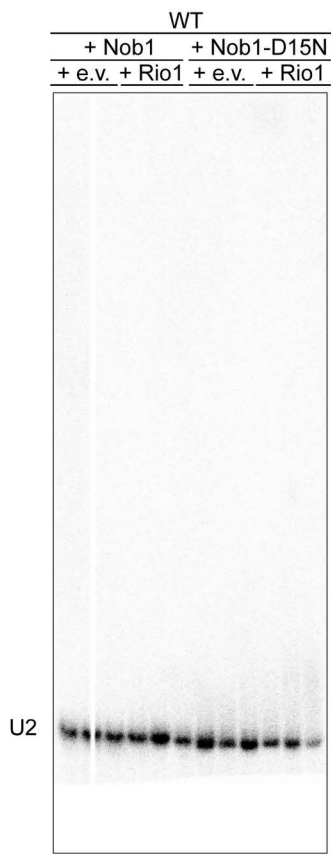

**3C**WT + Nob1-D15N + e.v.WT + Nob1-D15N + Rio1

| 2 | 3 | 4 | 5 | 6 | 7 | 8 | 9 | 10 | 11 | 12 | 13 | | 2 | 3 | 4 | 5 | 6 | 7 | 8 | 9 | 10 | 11 | 12 | 13 |

20S

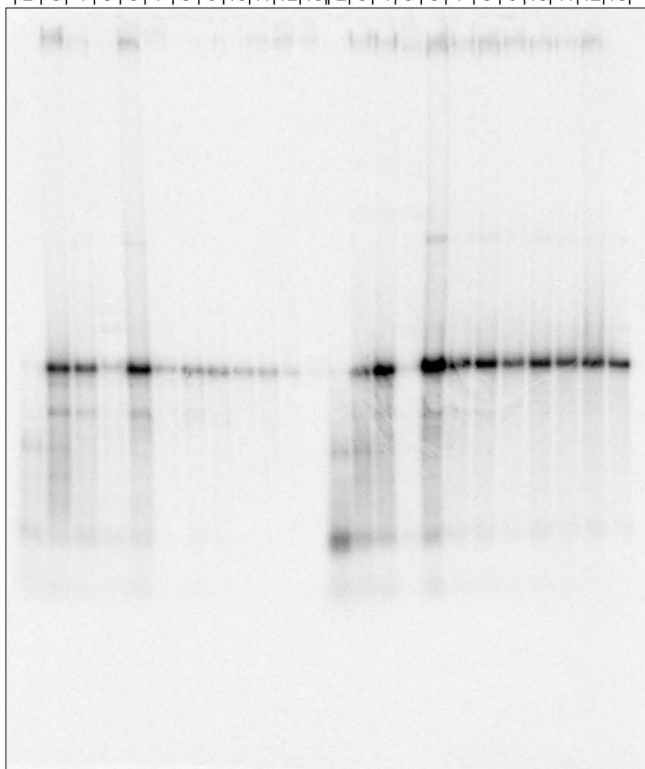WT + Nob1-D15N + e.v.WT + Nob1-D15N + Rio1

| 2 | 3 | 4 | 5 | 6 | 7 | 8 | 9 | 10 | 11 | 12 | 13 | | 2 | 3 | 4 | 5 | 6 | 7 | 8 | 9 | 10 | 11 | 12 | 13 |

20S  
18S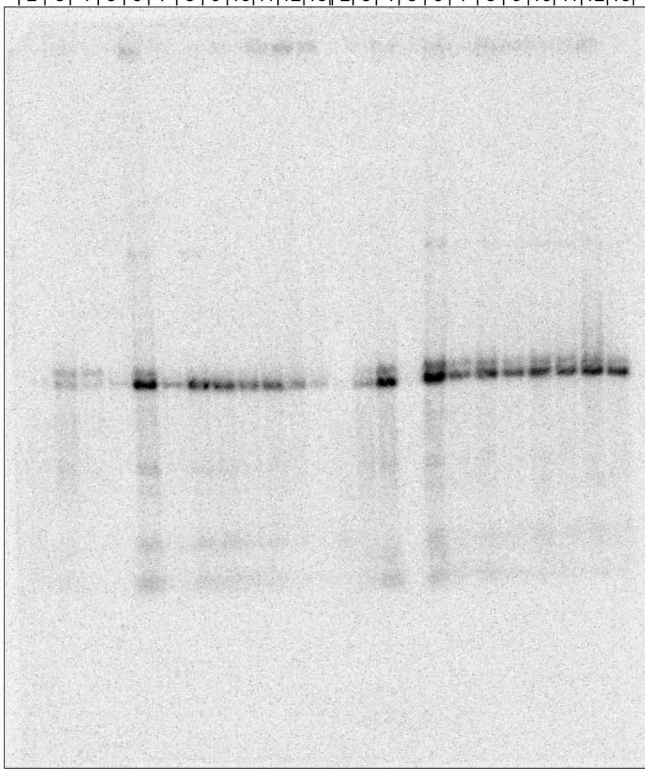

**3C**

WT + Nob1-D15N + e.v.

WT + Nob1-D15N + Rio1

| 2 | 3 | 4 | 5 | 6 | 7 | 8 | 9 | 10 | 11 | 12 | 13 | | 2 | 3 | 4 | 5 | 6 | 7 | 8 | 9 | 10 | 11 | 12 | 13 |

25S

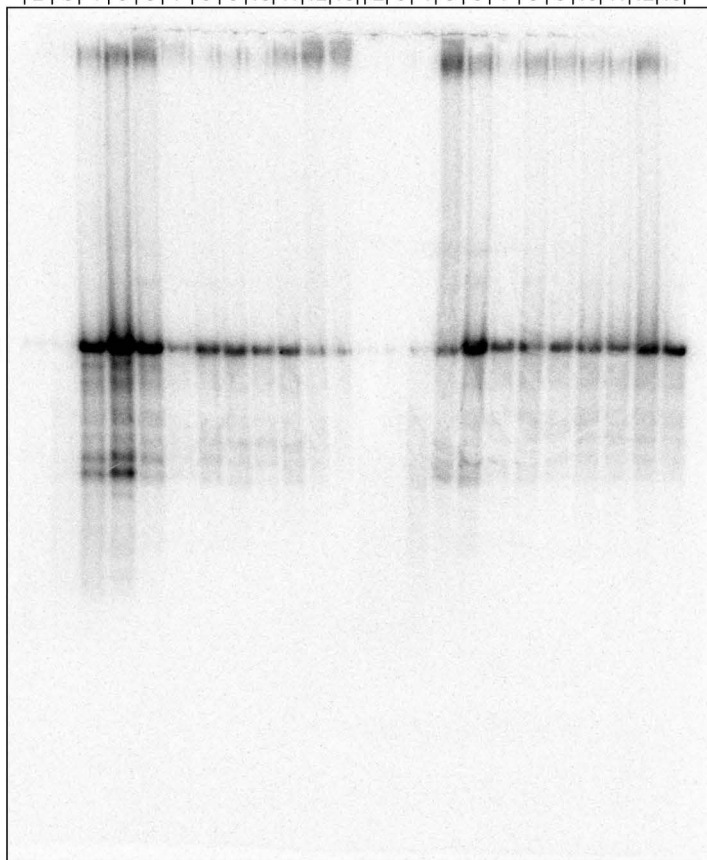

WT + Nob1-D15N + e.v.

| 4 | 5 | 6 | 7 | 8 | 9 | 10 | 11 | 12 | 13 |

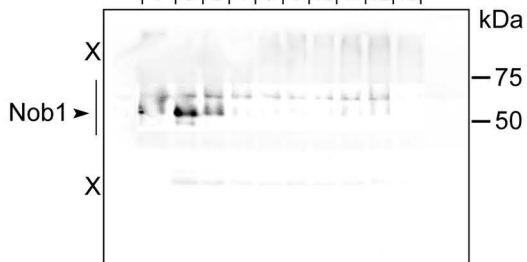

WT + Nob1-D15N + Rio1

| 4 | 5 | 6 | 7 | 8 | 9 | 10 | 11 | 12 | 13 |

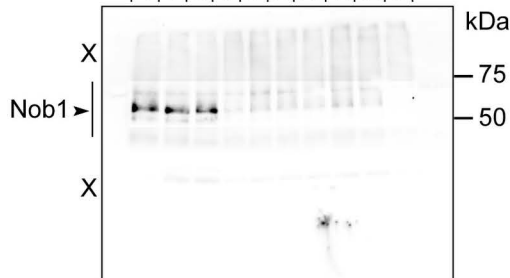

WT + Nob1-D15N + e.v.

| 4 | 5 | 6 | 7 | 8 | 9 | 10 | 11 | 12 | 13 |

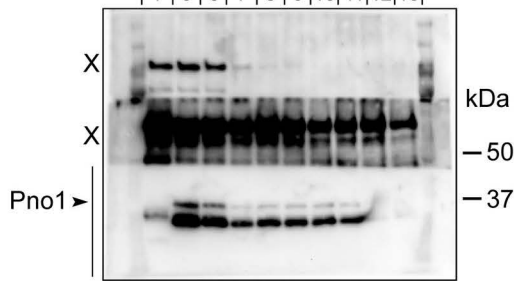

WT + Nob1-D15N + Rio1

| 4 | 5 | 6 | 7 | 8 | 9 | 10 | 11 | 12 | 13 |

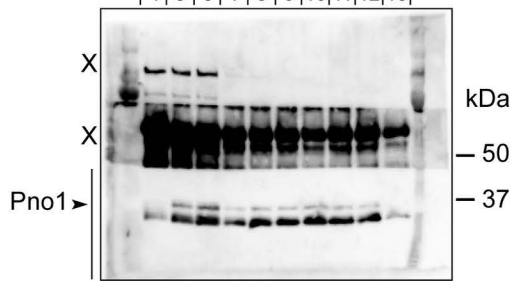

**4A**

MBP-Rio1 +  
Nob1 + Pno1  
+ AMPPNP

MBP-Rio1 +  
Nob1 + Pno1  
+ ADP

In FT W E X X X X In FT W E X

kDa  
250  
150  
100  
75  
50  
37

MBP-Rio1

Nob1

\*

Pno1

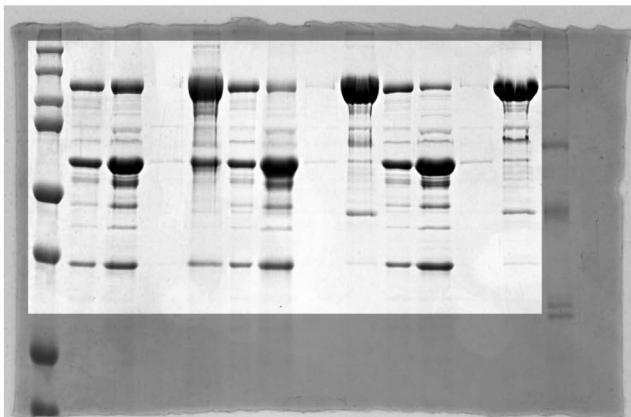



**4B**

Gal::Pno1; Gal::Rio1 + TAP-Pno1

Rio1  
 Rio1-D244A  
 Rio1-D261A  
 ATP  
 ADP  
 AMPPNP

|   |   |
|---|---|
| - | - |
| + | - |
| - | + |
| + | + |
| - | - |
| - | - |

Ladder

X X X X B R B R X X X X Ladder

Ladder

kDa

— 150  
 — 100  
 — 75  
 — 50  
 — 37

Pno1 ▶

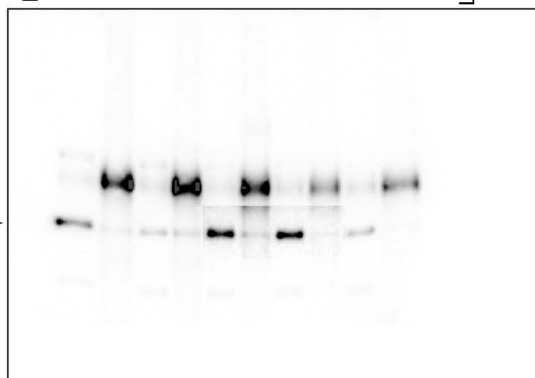

Nob1 ▶

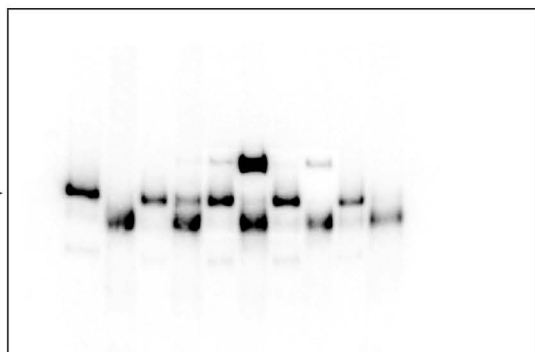

Rpl3 ▶

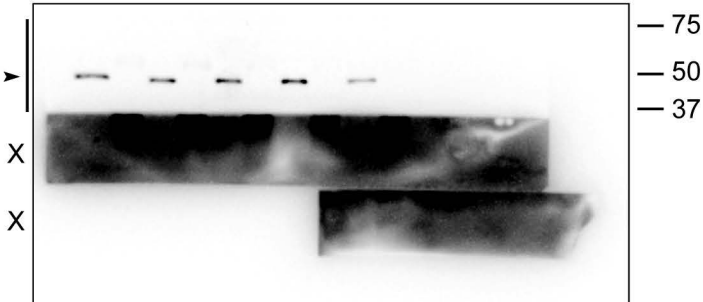

Rps8 ▶

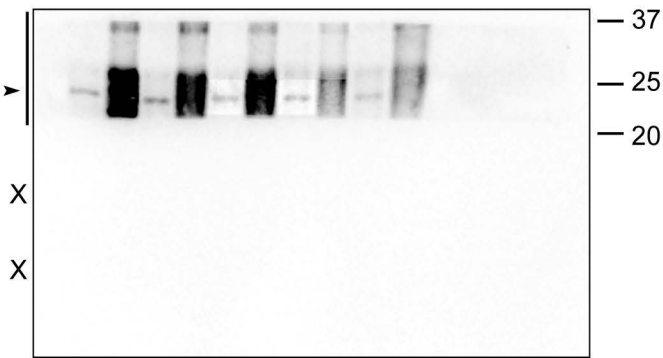

**4B**

Gal::Pno1; Gal::Rio1 + TAP-Pno1

|            |   |   |   |   |   |
|------------|---|---|---|---|---|
| Rio1       | - | + | + | + | + |
| Rio1-D244A | - | - | - | - | - |
| Rio1-D261A | - | - | - | - | - |
| ATP        | - | - | + | - | - |
| ADP        | - | - | - | + | - |
| AMPPNP     | - | - | - | - | + |

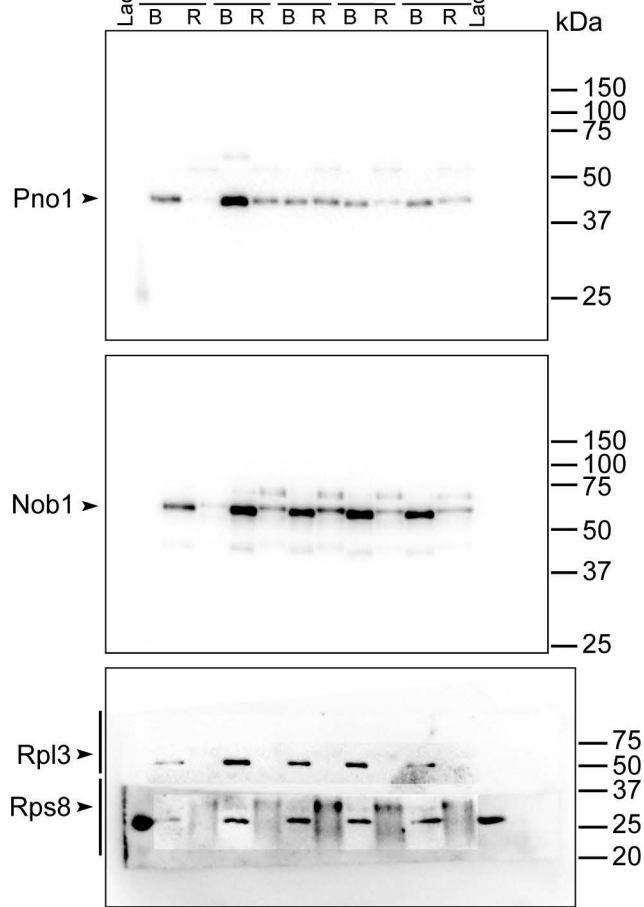

Gal::Pno1; Gal::Rio1 + TAP-Pno1

|            |   |   |   |
|------------|---|---|---|
| Rio1       | - | - | - |
| Rio1-D244A | - | - | - |
| Rio1-D261A | - | - | - |
| ATP        | + | - | - |
| ADP        | - | + | - |
| AMPPNP     | - | - | + |

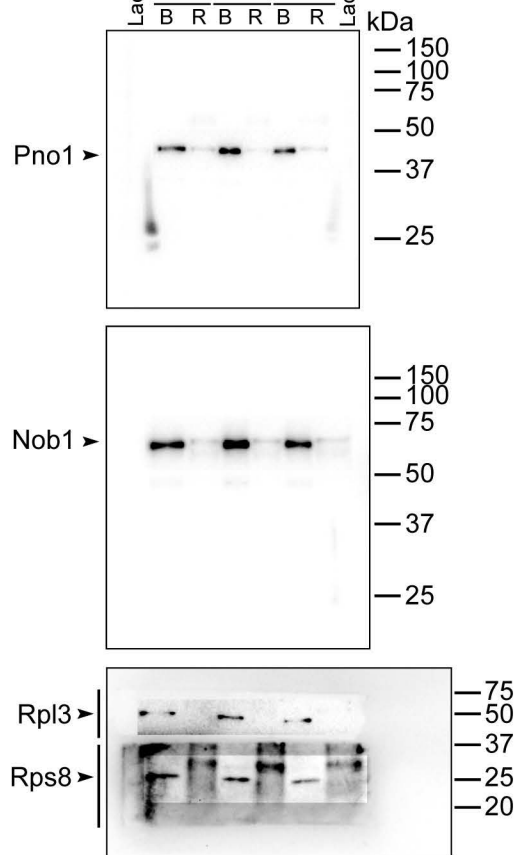

4E

Gal::Pno1; Gal::Rio1  
+ Pno1-KKKF + Pno1  
+ Rio1 + e.v. + Rio1 + e.v. X

20S  
18S  
25S

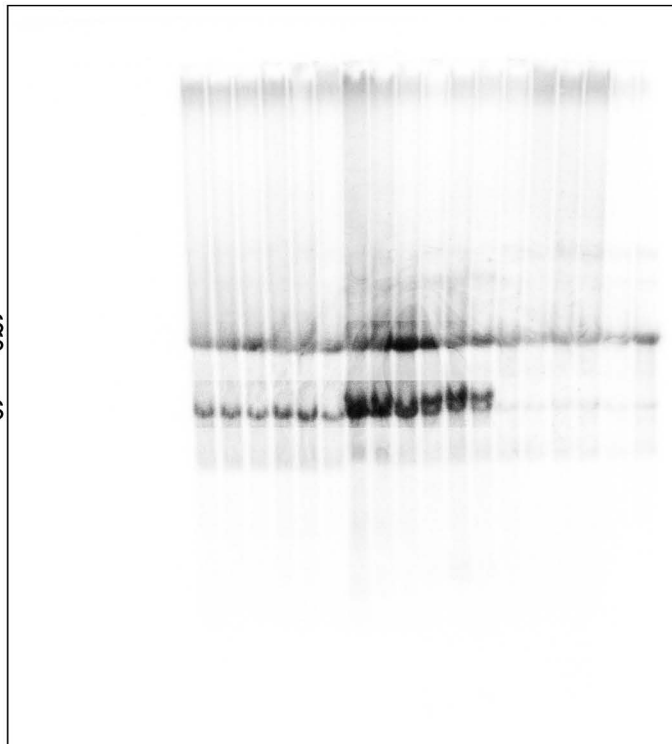

Gal::Pno1; Gal::Rio1  
+ Pno1-KKKF + Pno1  
+ Rio1 + e.v. + Rio1 + e.v. X

U2

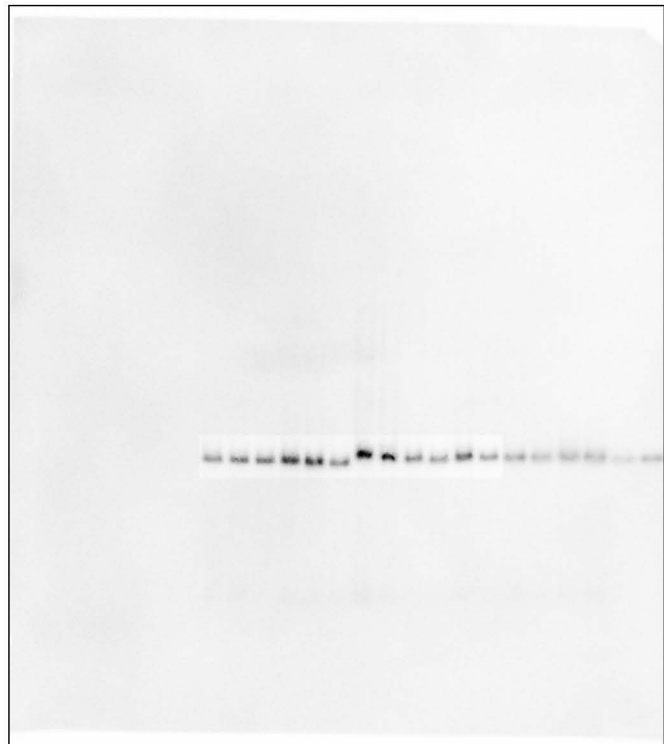

4E

Gal::Pno1; Gal::Rio1  
+ Pno1-KKKF    + Pno1  
+ Rio1+ e.v. + Rio1+ e.v.    X

20S

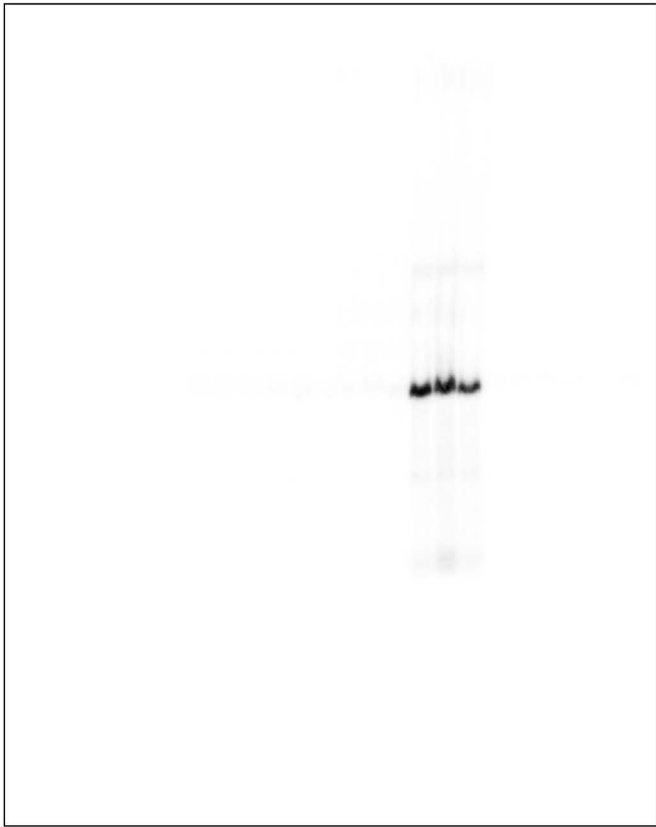

Gal::Pno1; Gal::Rio1  
+ Pno1-KKKF    + Pno1  
+ Rio1+ e.v. + Rio1+ e.v.    X

20S

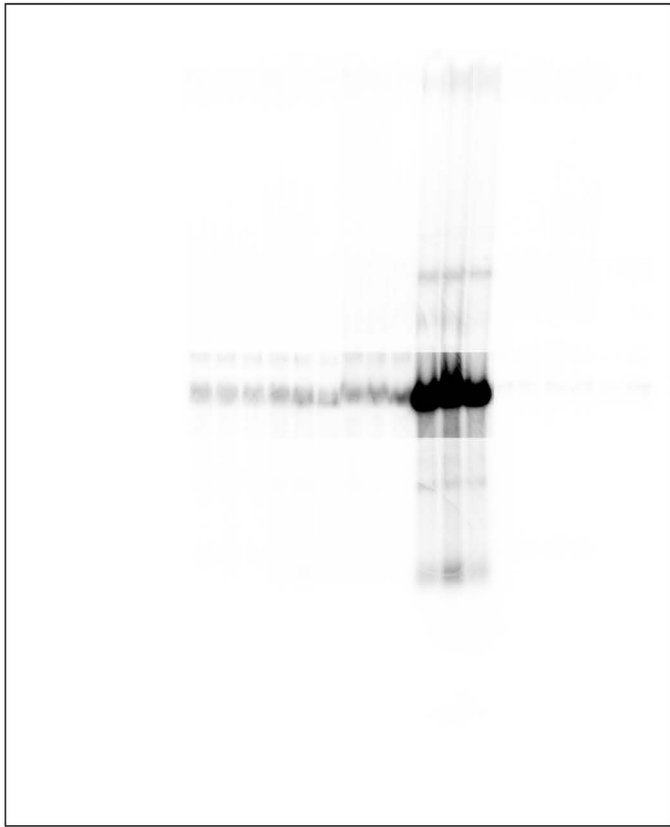

**4F** Pno1 + e.v.

X

| 2 | 3 | 4 | 5 | 6 | 7 | 8 | 9 | 10 | 11 | 12 | 13 |

20S

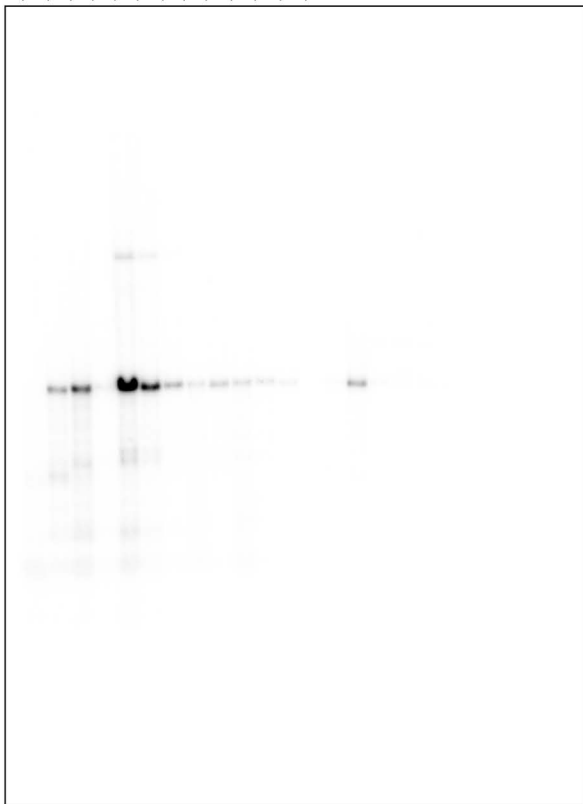

**4G** Pno1-KKKF + e.v.

X

| 2 | 3 | 4 | 5 | 6 | 7 | 8 | 9 | 10 | 11 | 12 | 13 |

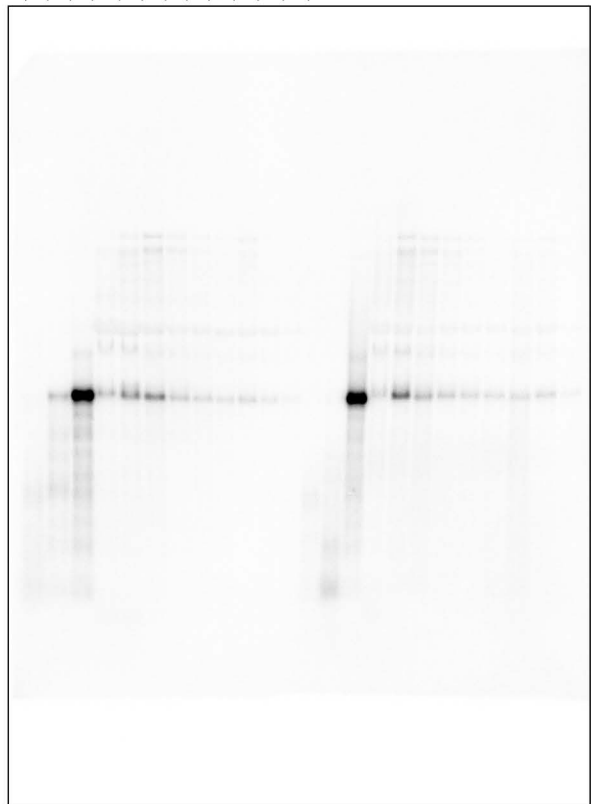

20S  
18S

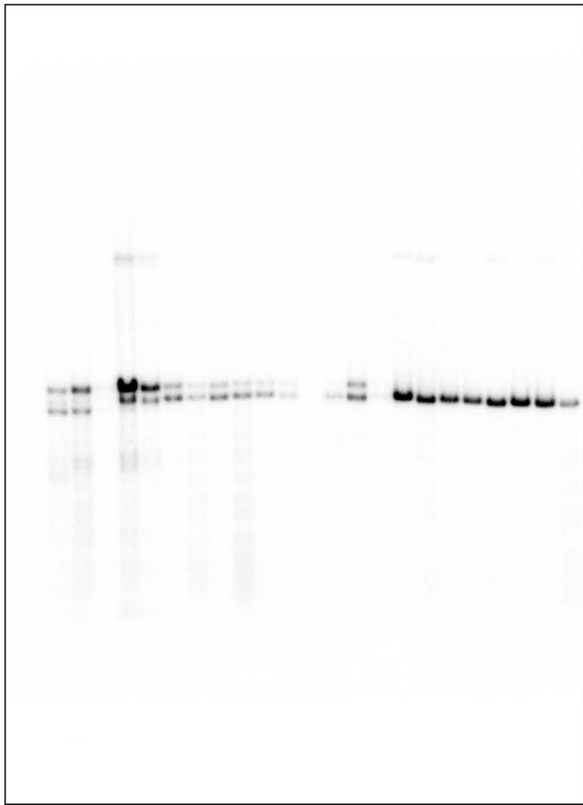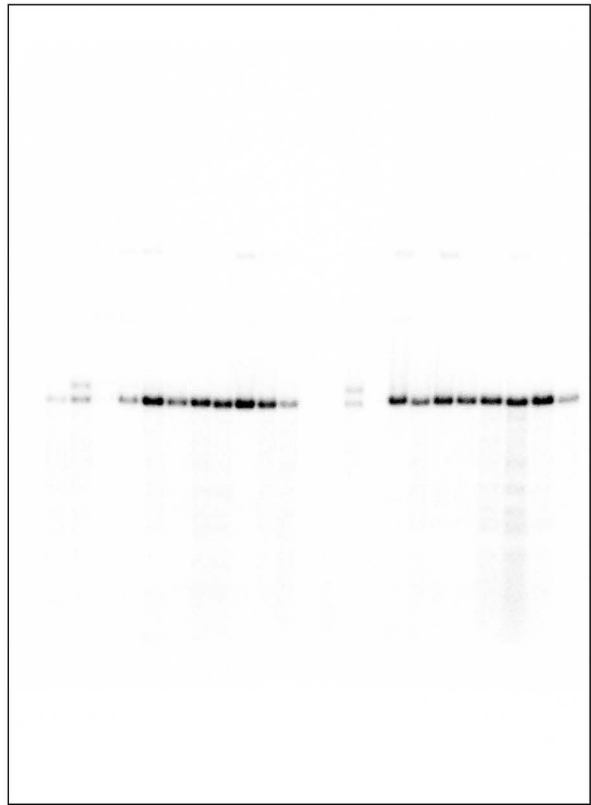

**4F** Pno1 + e.v.

| 2 | 3 | 4 | 5 | 6 | 7 | 8 | 9 | 10 | 11 | 12 | 13 |

X

25S

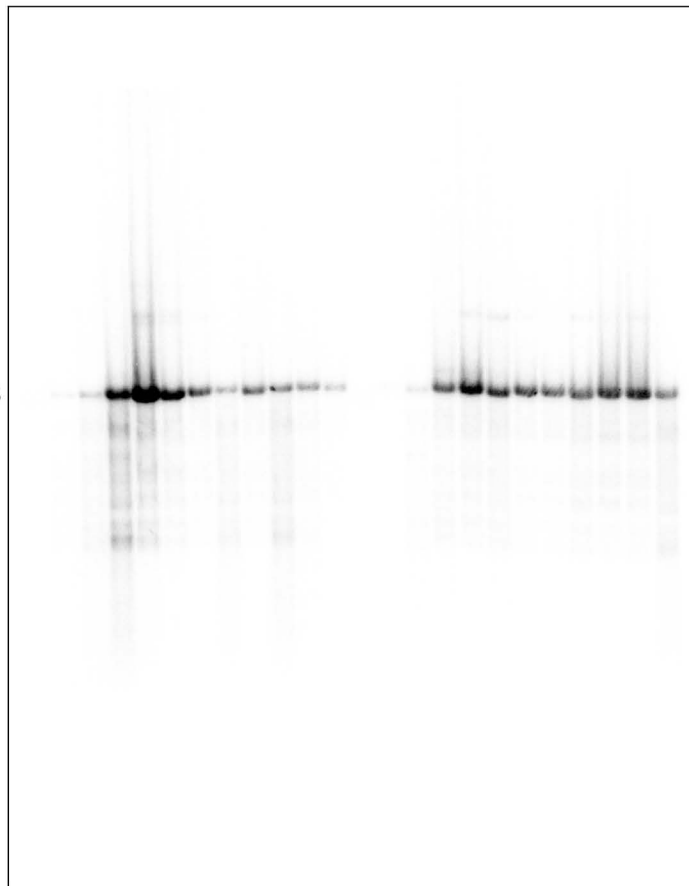

**4G** Pno1-KKKF + e.v.

| 2 | 3 | 4 | 5 | 6 | 7 | 8 | 9 | 10 | 11 | 12 | 13 |

X

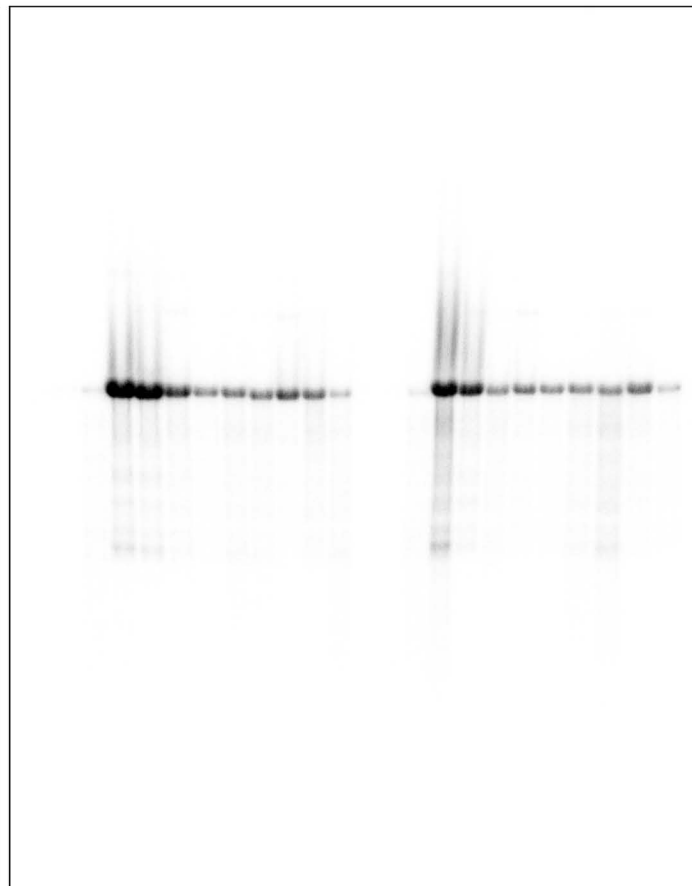

5A

X

Nob1-363

| 2 | 3 | 4 | 5 | 6 | 7 | 8 | 9 | 10 | 11 | 12 | 13 |

20S

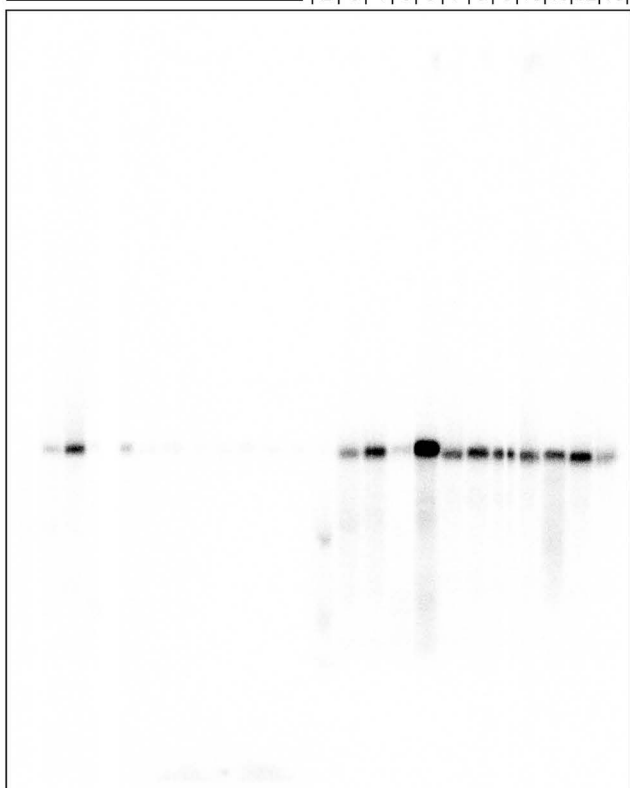

20S  
18S

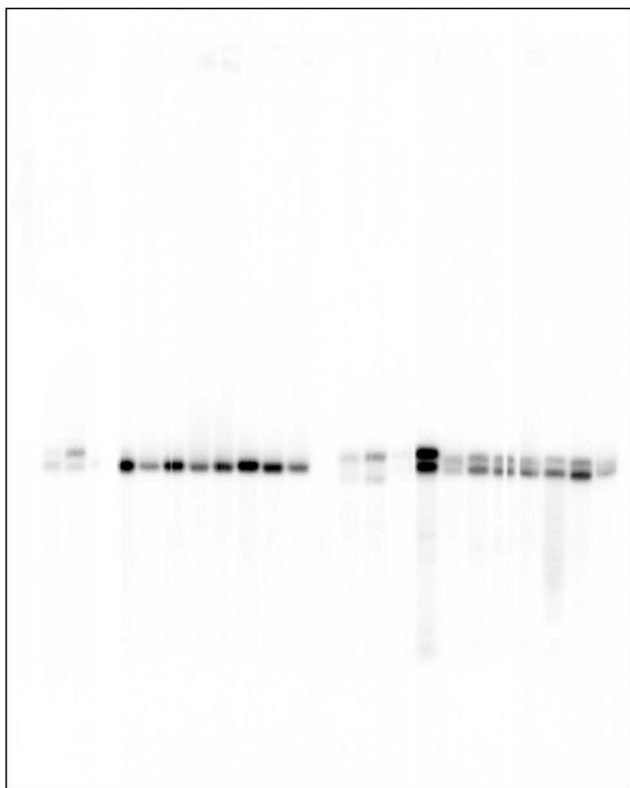

5A

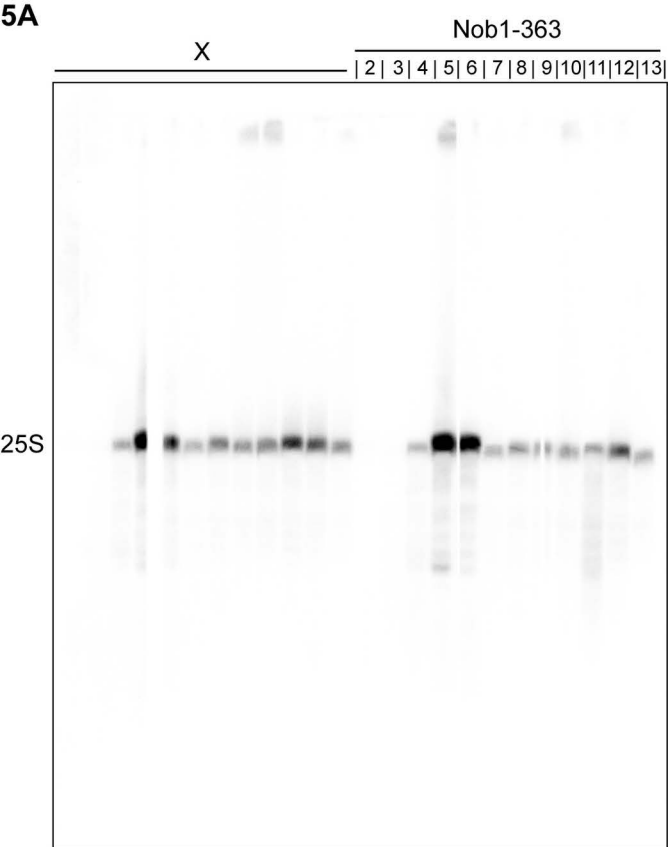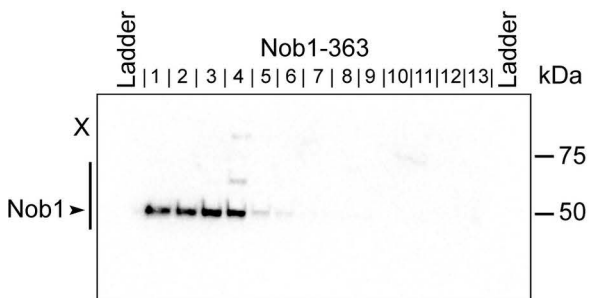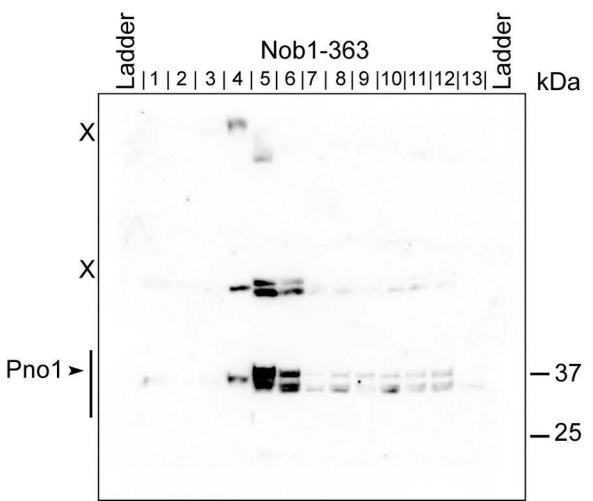



X

**5B Pno1**

| 2 | 3 | 4 | 5 | 6 | 7 | 8 | 9 | 10 | 11 | 12 | 13 |

20S

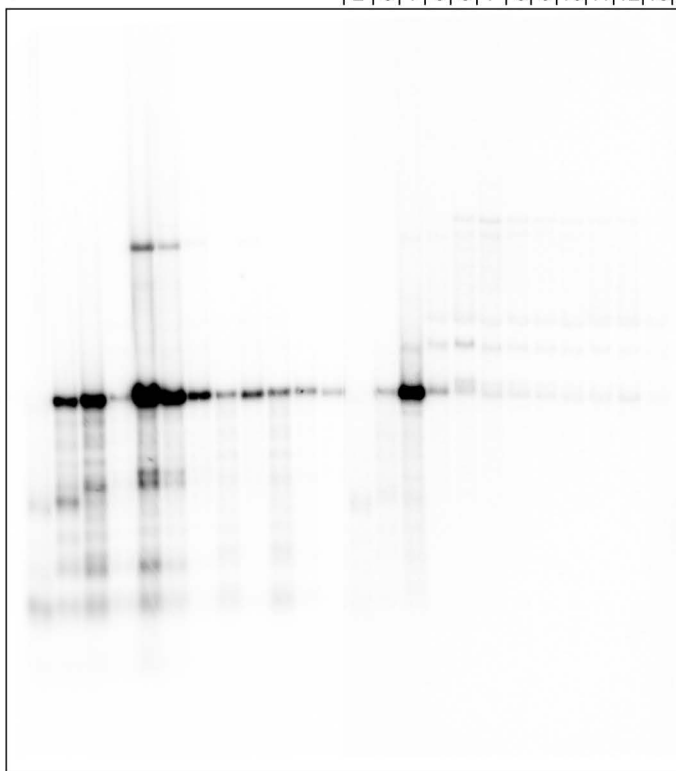

X

**5C Pno1-KKKF**

| 2 | 3 | 4 | 5 | 6 | 7 | 8 | 9 | 10 | 11 | 12 | 13 |

20S

18S

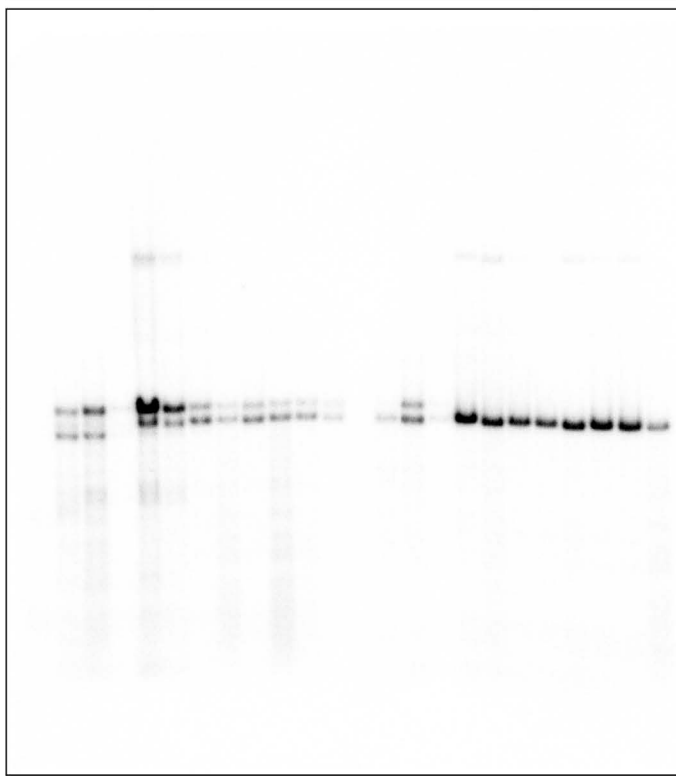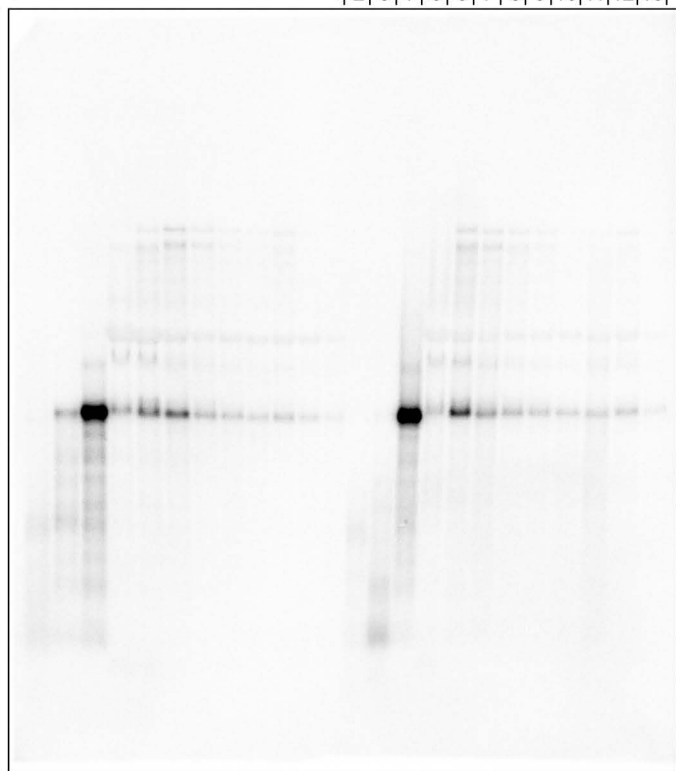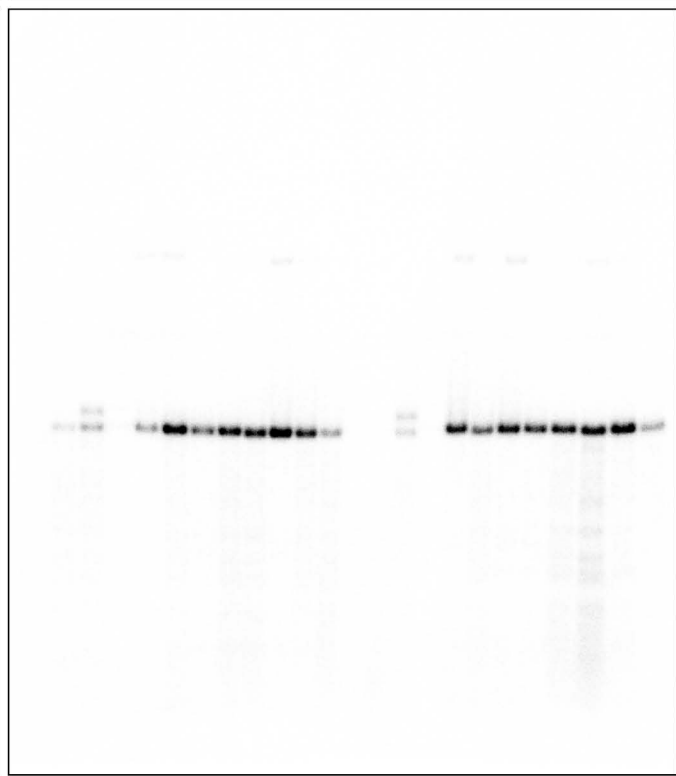

X

| 2 | 3 | 4 | 5 | 6 | 7 | 8 | 9 | 10 | 11 | 12 | 13 |

**5B Pno1**

25S

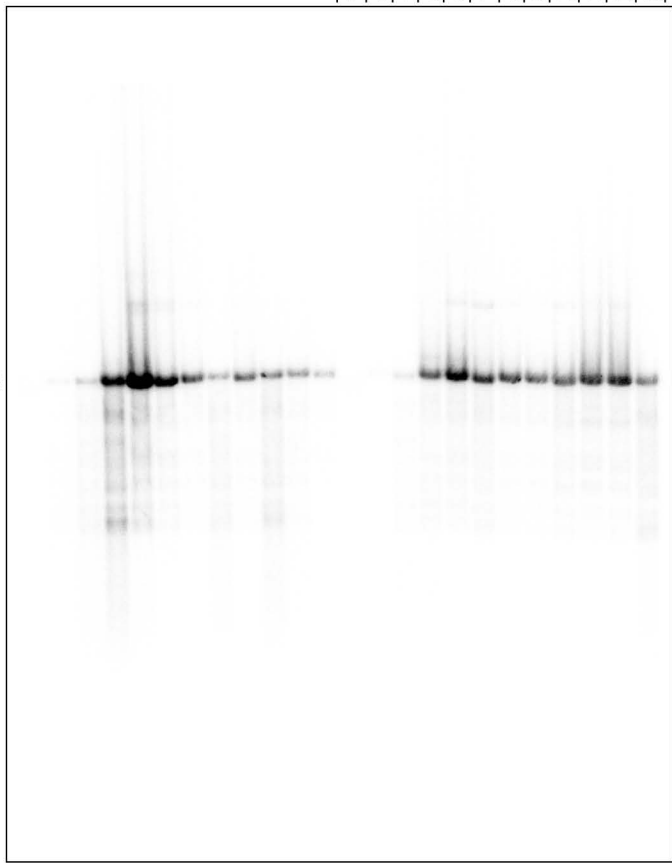

X

| 2 | 3 | 4 | 5 | 6 | 7 | 8 | 9 | 10 | 11 | 12 | 13 |

**5C Pno1-KKKF**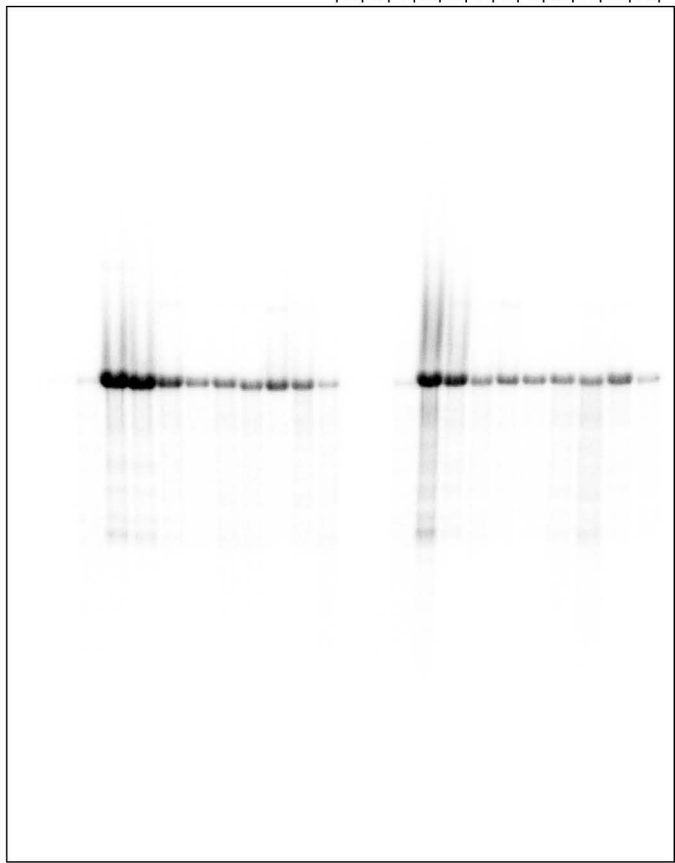

**S1A**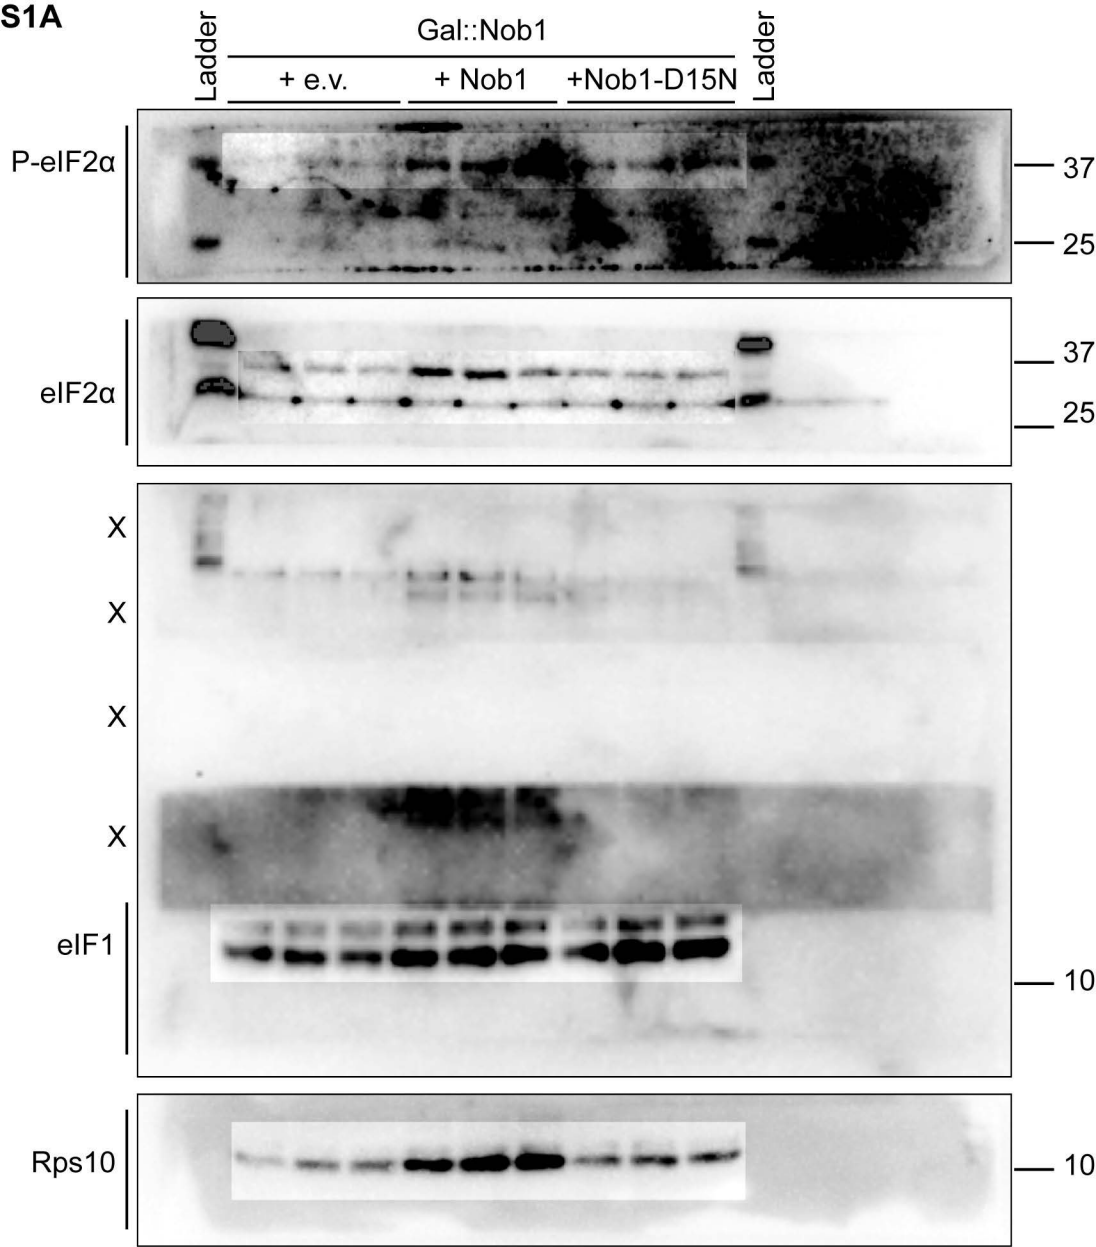

**S1C**Gal::*Nob1*WT + *Nob1*-D15N

WT + e.v.

Hours  
in media

0 2 4 6 8 10 12 16 X X X X X X X X 0 2 4 6 8 10 12 16 0 2 4 6 8 10 12 16

20S  
18S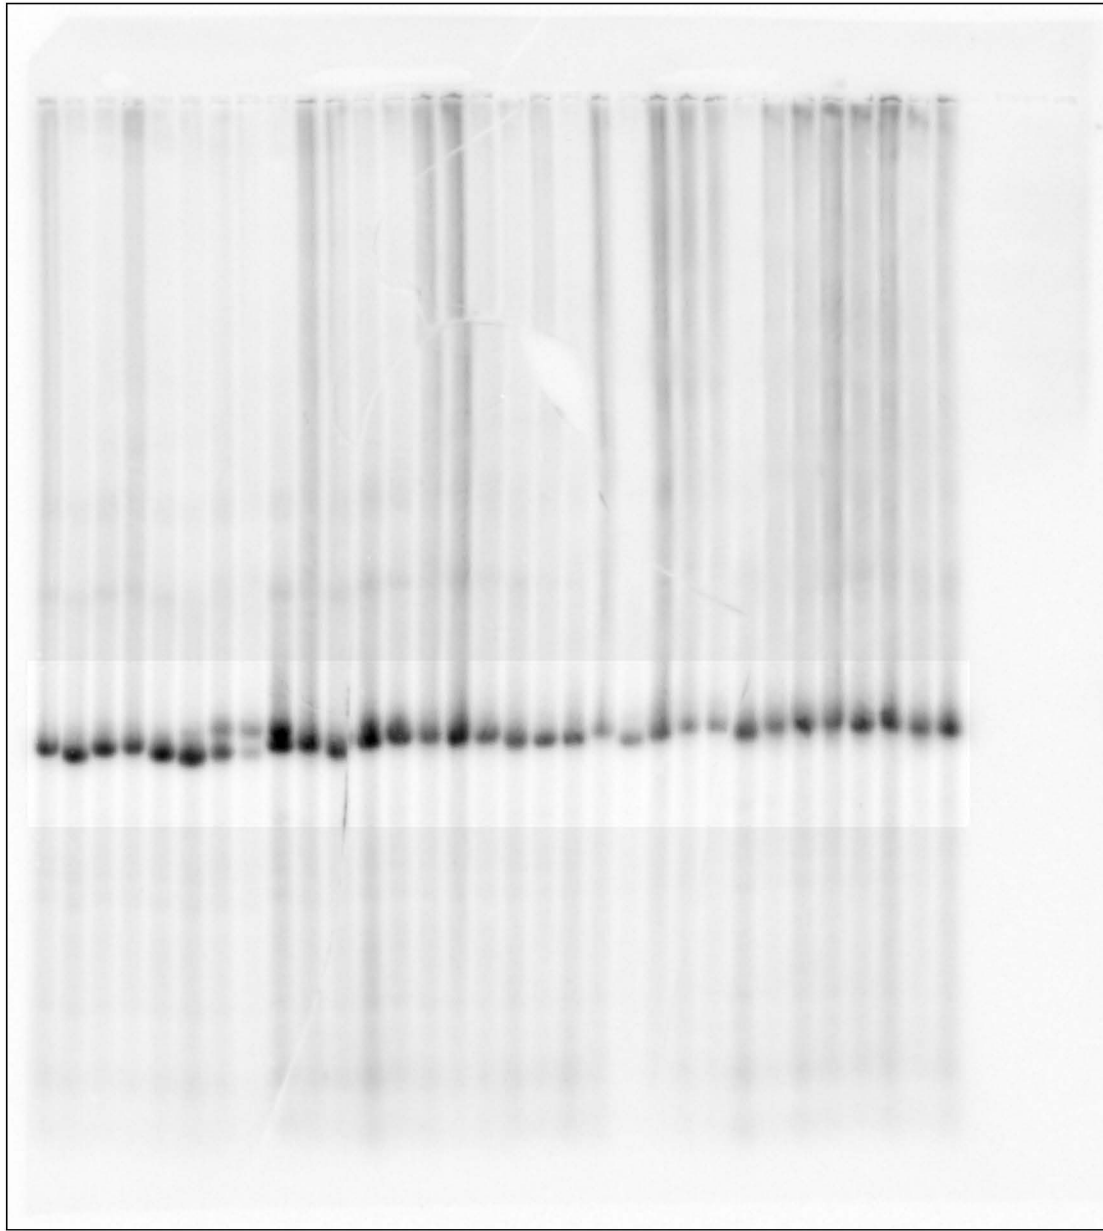

**S1C**Gal::*Nob1*WT + *Nob1*-D15N

WT + e.v.

Hours  
in media

0 2 4 6 8 10 12 16 X X X X X X X X 0 2 4 6 8 10 12 16 0 2 4 6 8 10 12 16

20S

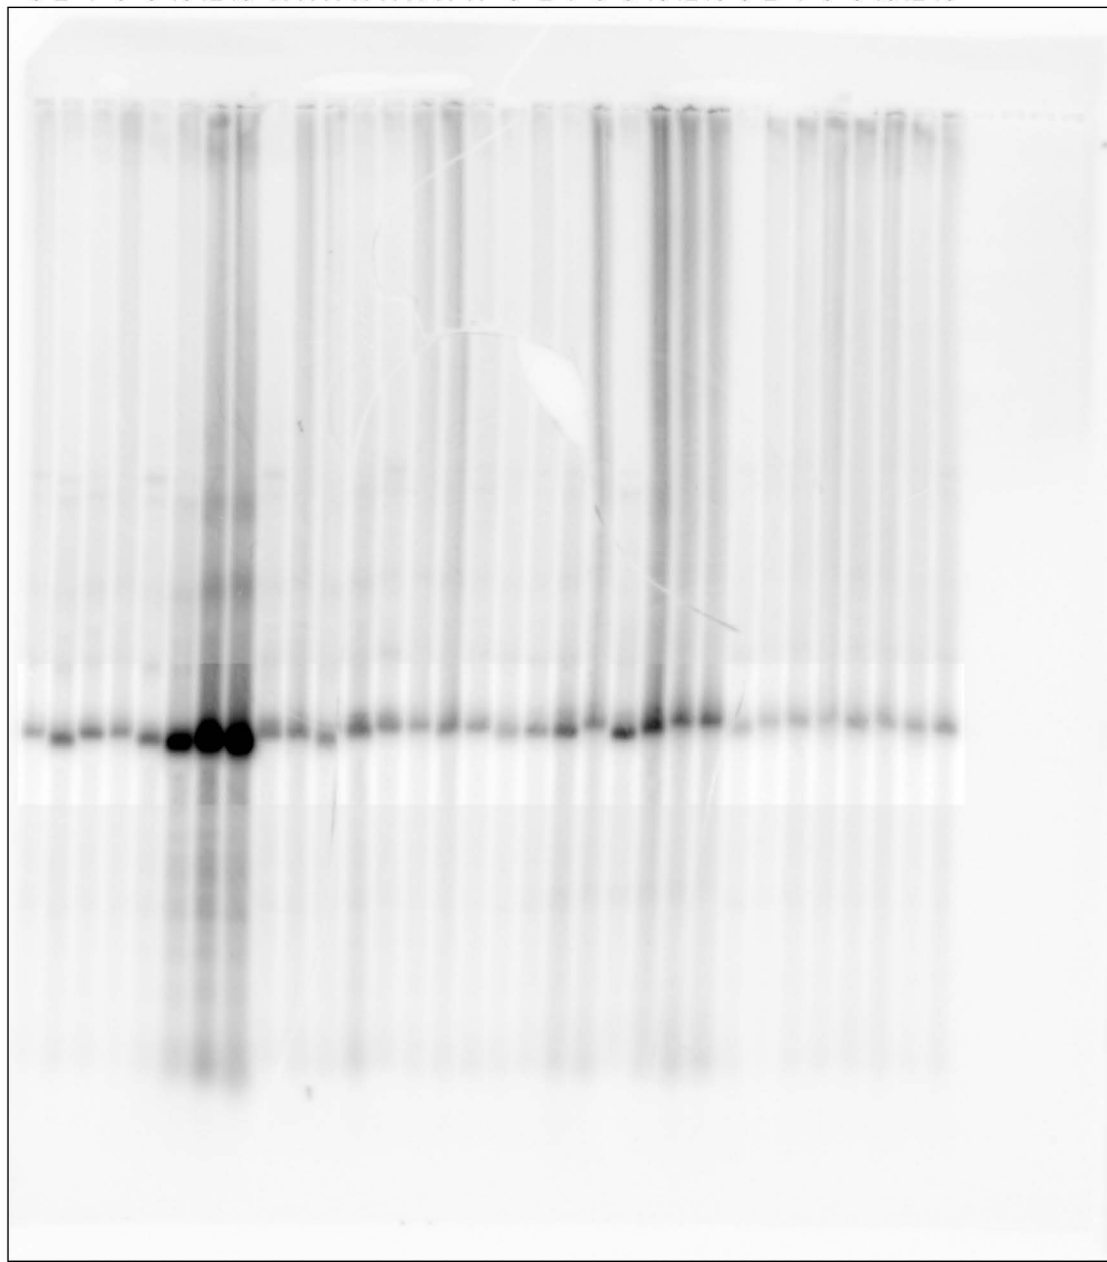

**S1C**Gal::*Nob1*WT + *Nob1*-D15N

WT + e.v.

Hours  
in media

0 2 4 6 8 10 12 16 X X X X X X X X 0 2 4 6 8 10 12 16 0 2 4 6 8 10 12 16

25S

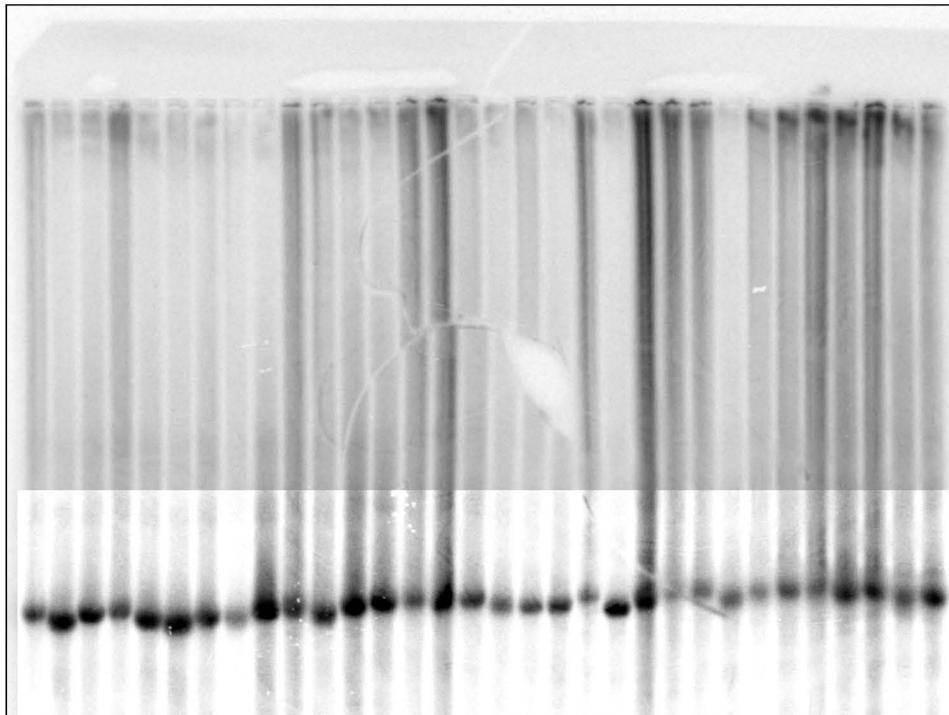

**S1C**

Gal::Nob1

WT + Nob1-D15N

WT + e.v.

Hours  
in media

0 2 4 6 8 10 12 16 X X X X X X X X 0 2 4 6 8 10 12 16 0 2 4 6 8 10 12 16

U2

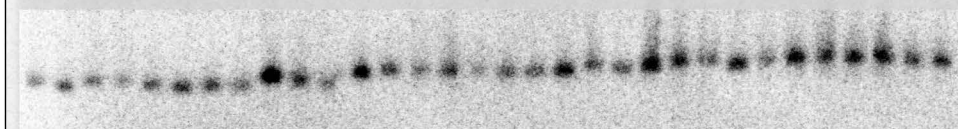

**S1D**

X

Gal::Rio1

| 2 | 3 | 4 | 5 | 6 | 7 | 8 | 9 | 10 | 11 | 12 | 13 |

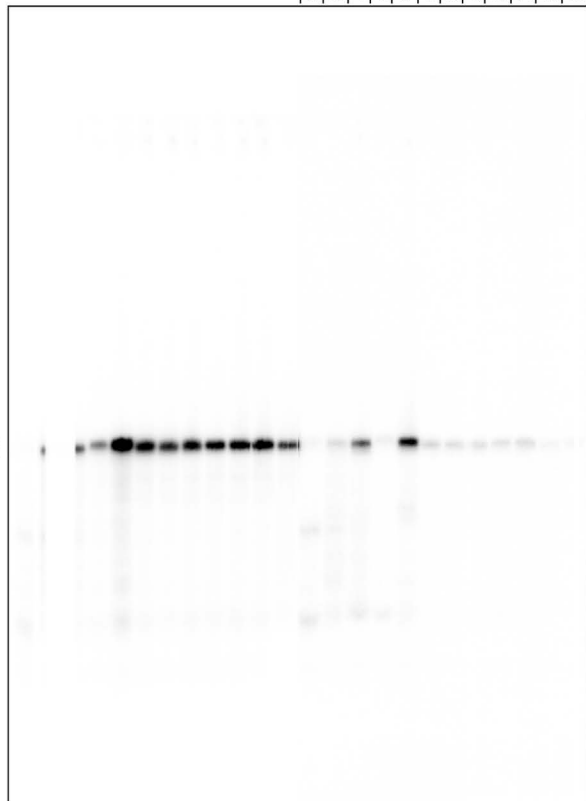

X

Gal::Rio1

| 2 | 3 | 4 | 5 | 6 | 7 | 8 | 9 | 10 | 11 | 12 | 13 |

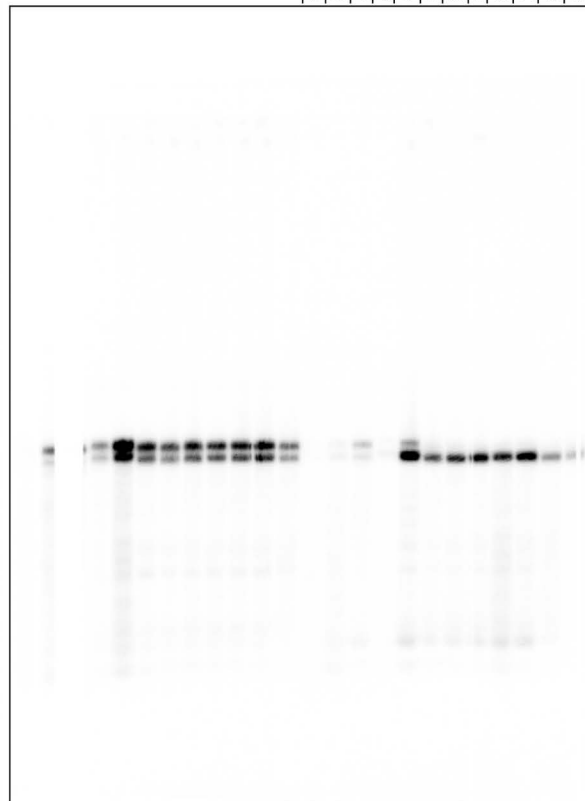20S  
18S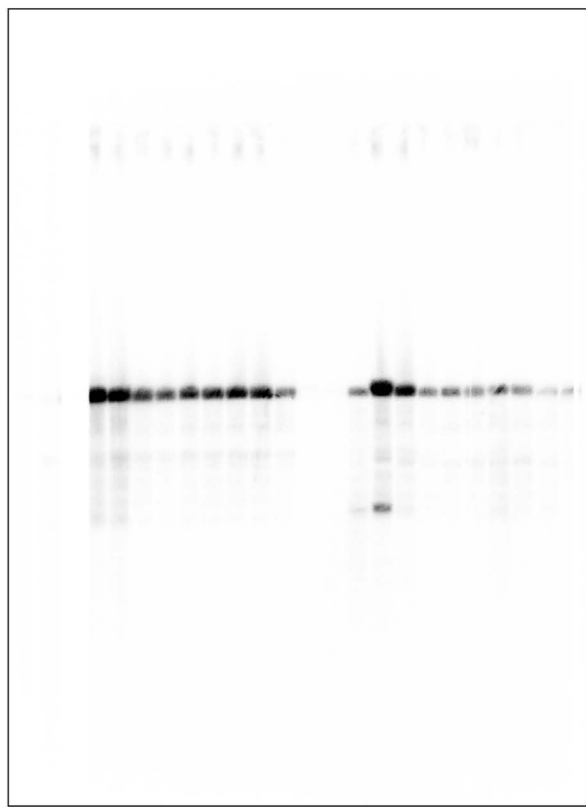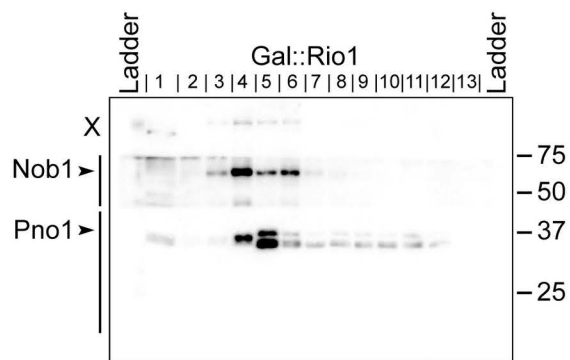

Nob1

Pno1

-75

-50

-37

-25



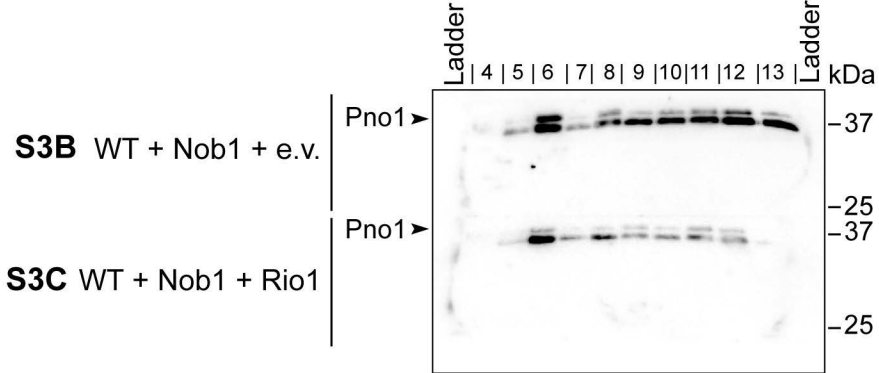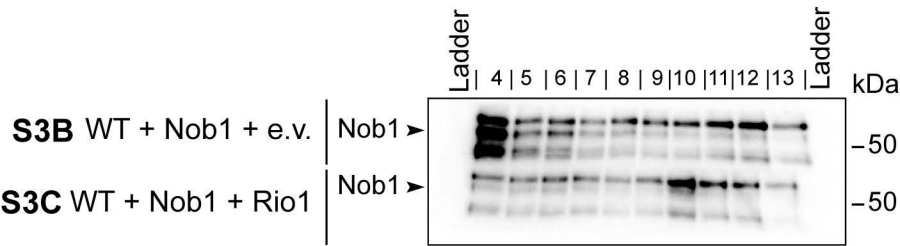

**S3B****S3C**

WT + Nob1 + e.v.

WT + Nob1 + Rio1

| 2 | 3 | 4 | 5 | 6 | 7 | 8 | 9 | 10 | 11 | 12 | 13 |

| 2 | 3 | 4 | 5 | 6 | 7 | 8 | 9 | 10 | 11 | 12 | 13 |

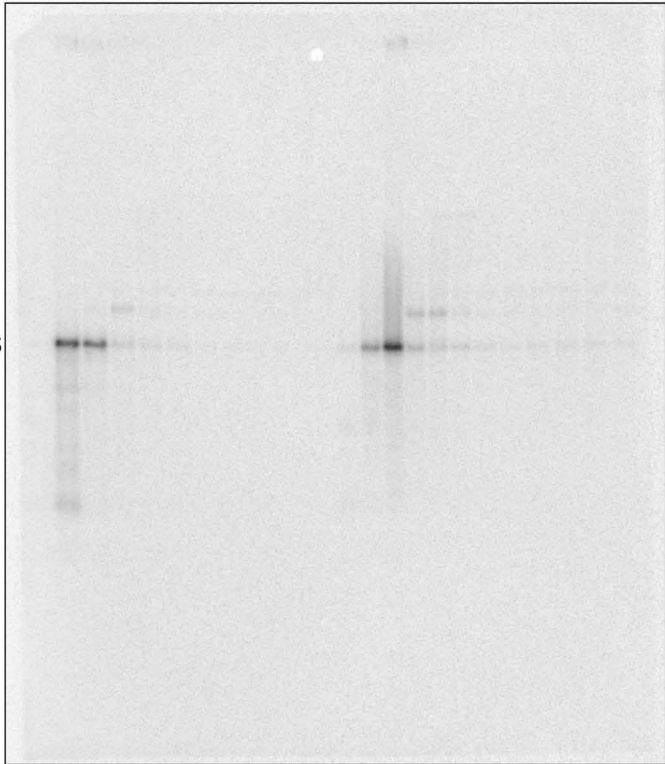**S3B****S3C**

WT + Nob1 + e.v.

WT + Nob1 + Rio1

| 2 | 3 | 4 | 5 | 6 | 7 | 8 | 9 | 10 | 11 | 12 | 13 |

| 2 | 3 | 4 | 5 | 6 | 7 | 8 | 9 | 10 | 11 | 12 | 13 |

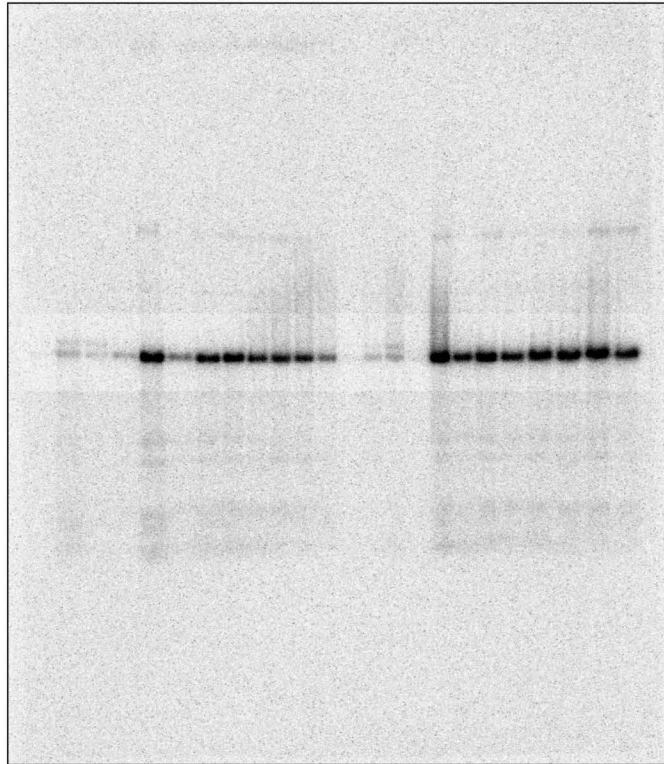

25S

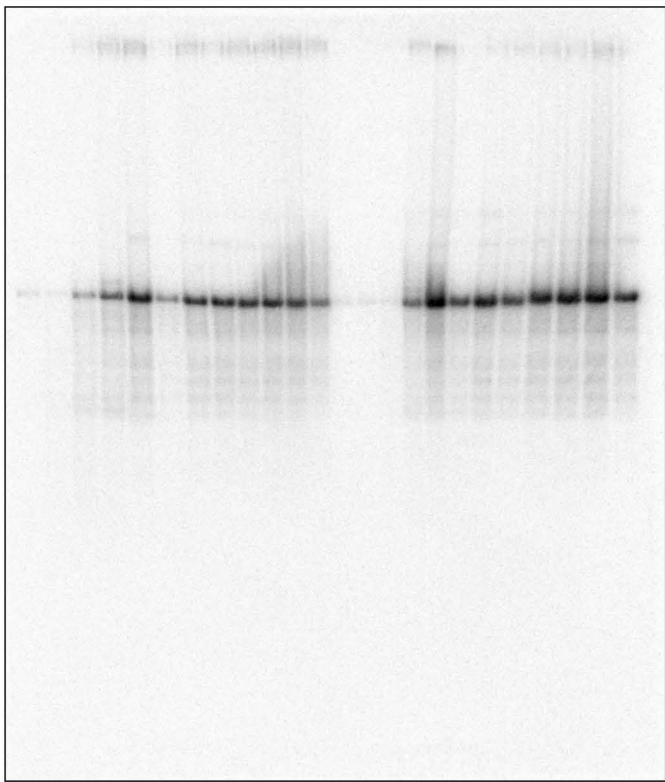

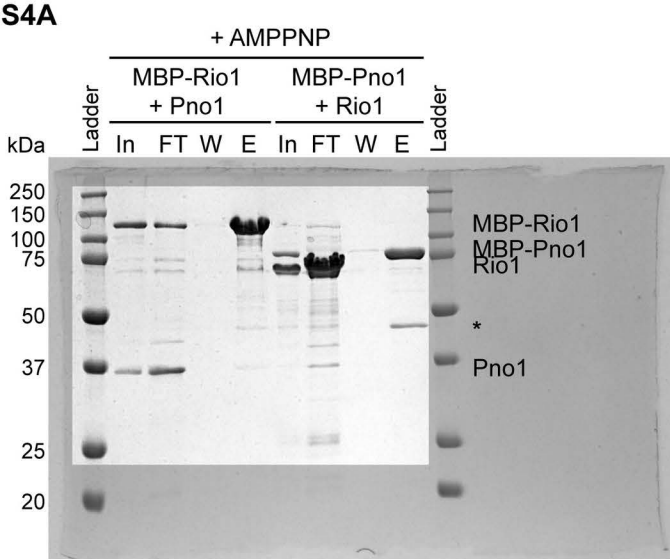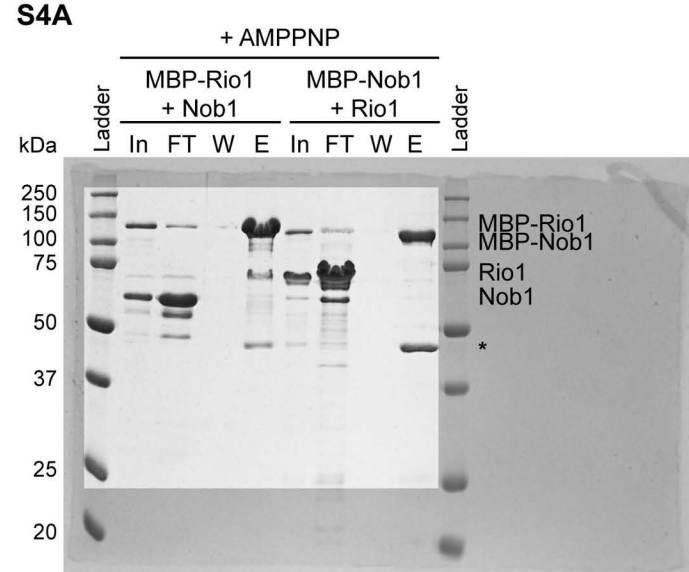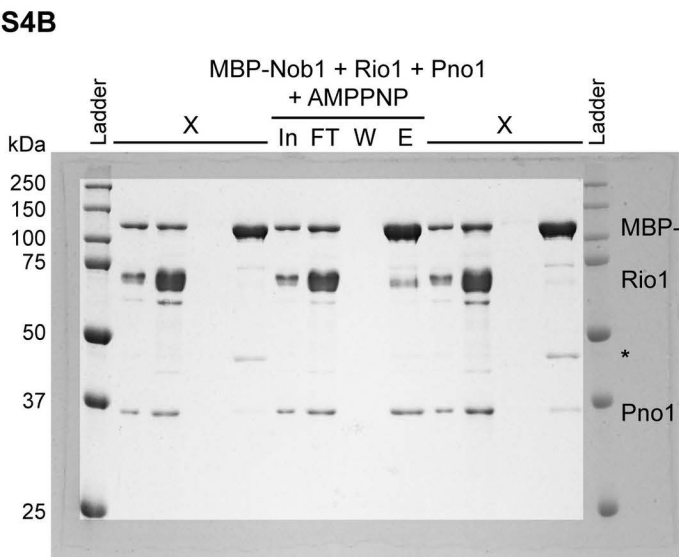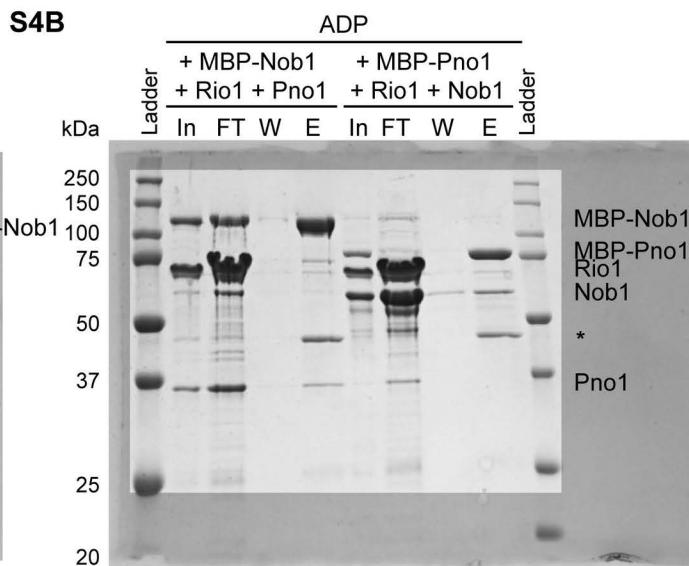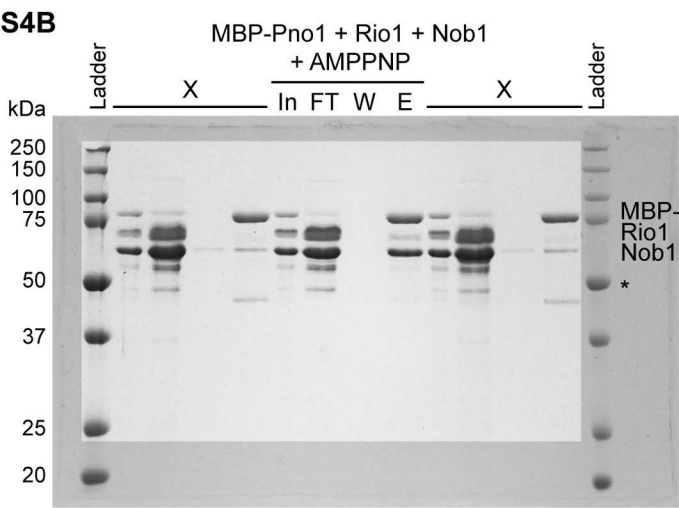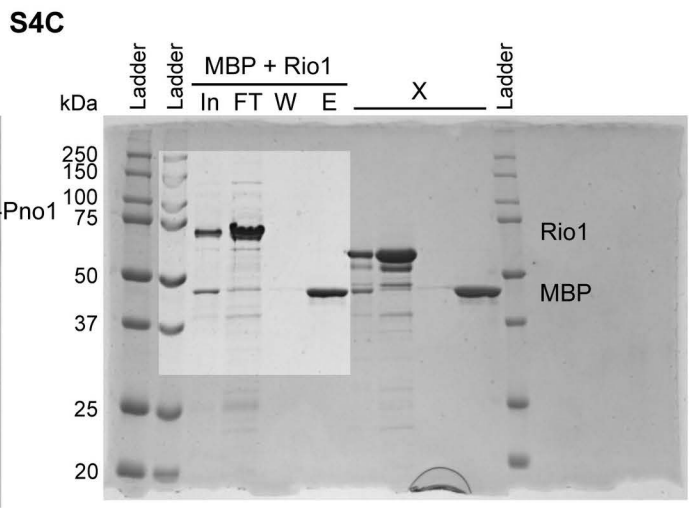

Supplement: pbio.3000329.s011.pdf [file pbio.3000329.s011.pdf]
